# Supplementary figures and images for: Elastomeric and soft conducting microwires for implantable neural interfaces
Source: Royal Society of Chemistry journal article supplement (doi:10.1039/c5sm00174a), 2015-01-01

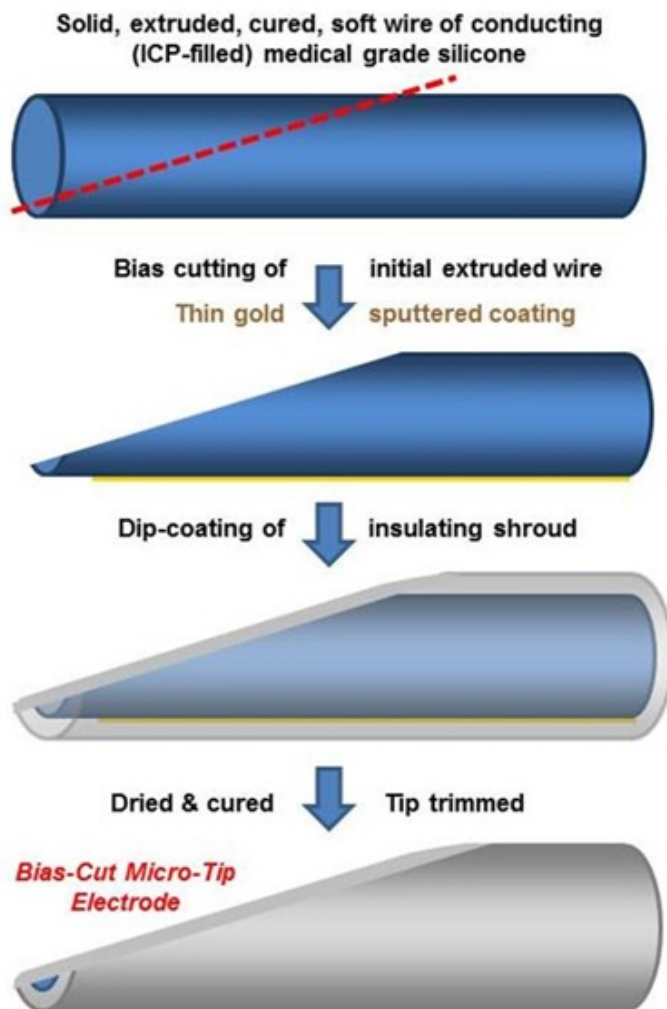

Supplement: c5sm00174a2.pdf [file c5sm00174a2.pdf]

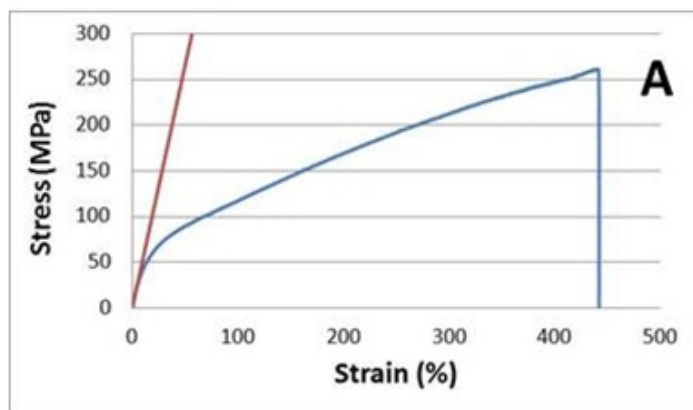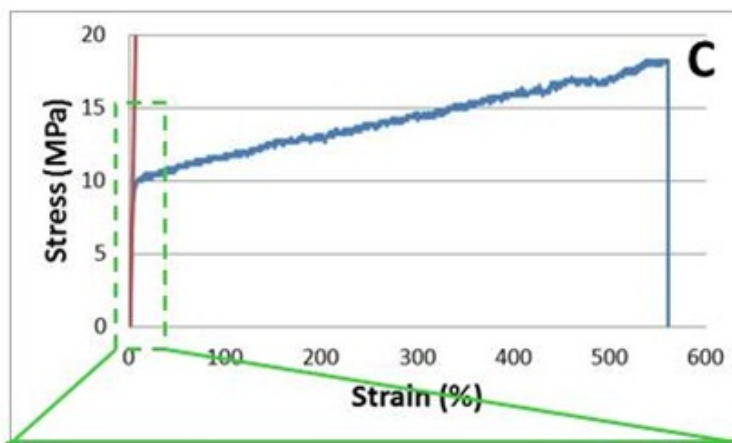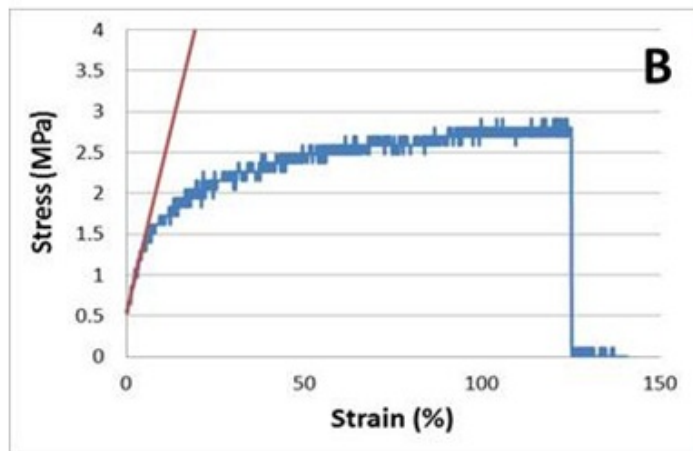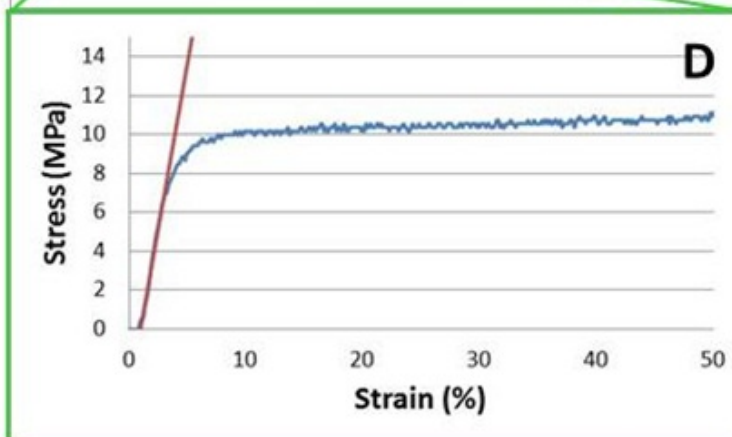

Supplement: c5sm00174a3.pdf [file c5sm00174a3.pdf]
